# Supplementary figures and images for: A new 65.8 topology and a distorted 65.8 CdSO4 topology: two new supramolecular isomers of [M2(bdc)2(L)2]n coordination polymersElectronic supplementary information (ESI) available: schematic illustrations of some common 4-connected 3D networks. See http://www.rsc.org/suppdata/cc/b3/b301221b/
Source: Royal Society of Chemistry journal article supplement (doi:10.1039/b301221b), 2003-01-01

# 4-connected nets: Quartz dual (“dense” net)

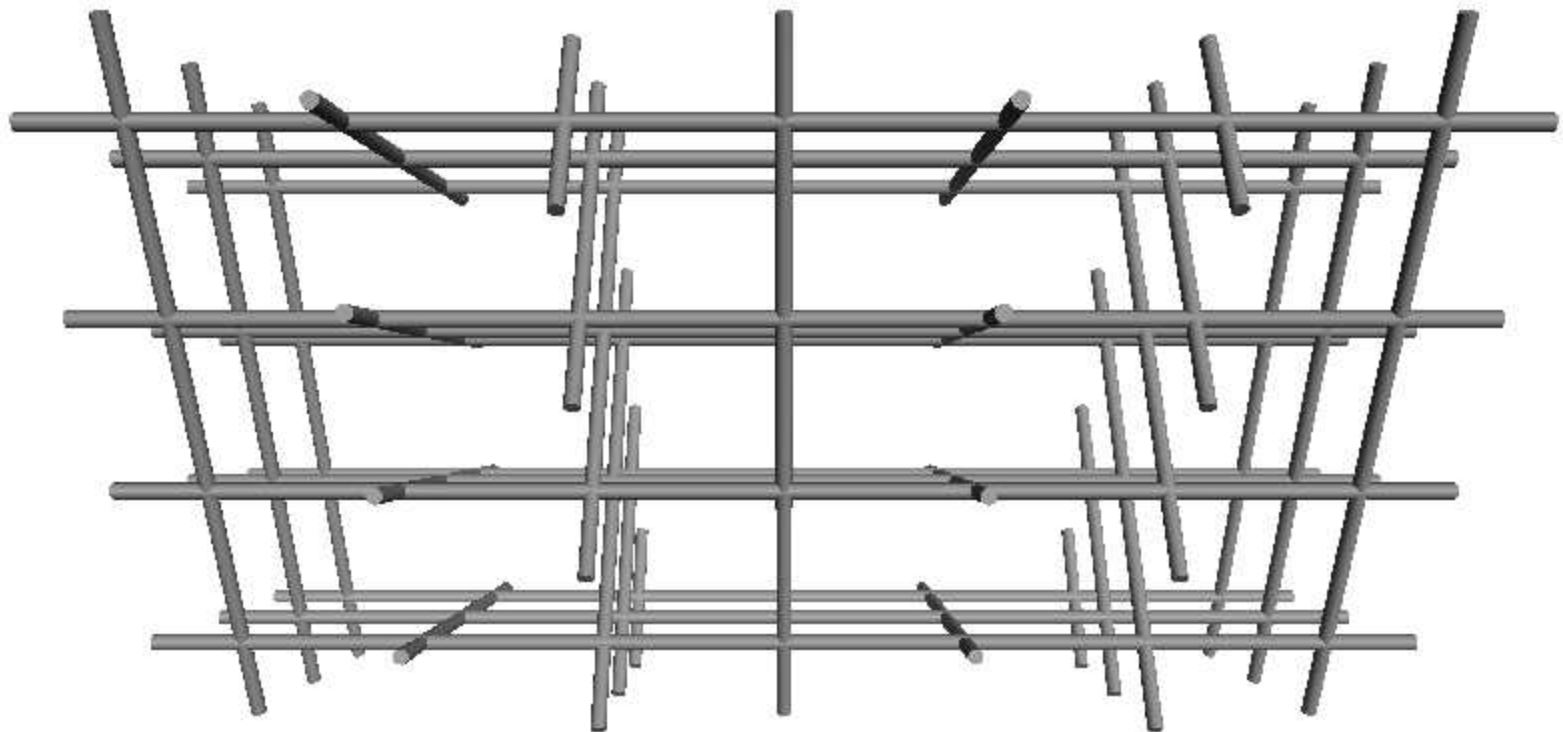

Supplement: b301221b1.pdf [file b301221b1.pdf]

## 4-connected nets: MOF-112

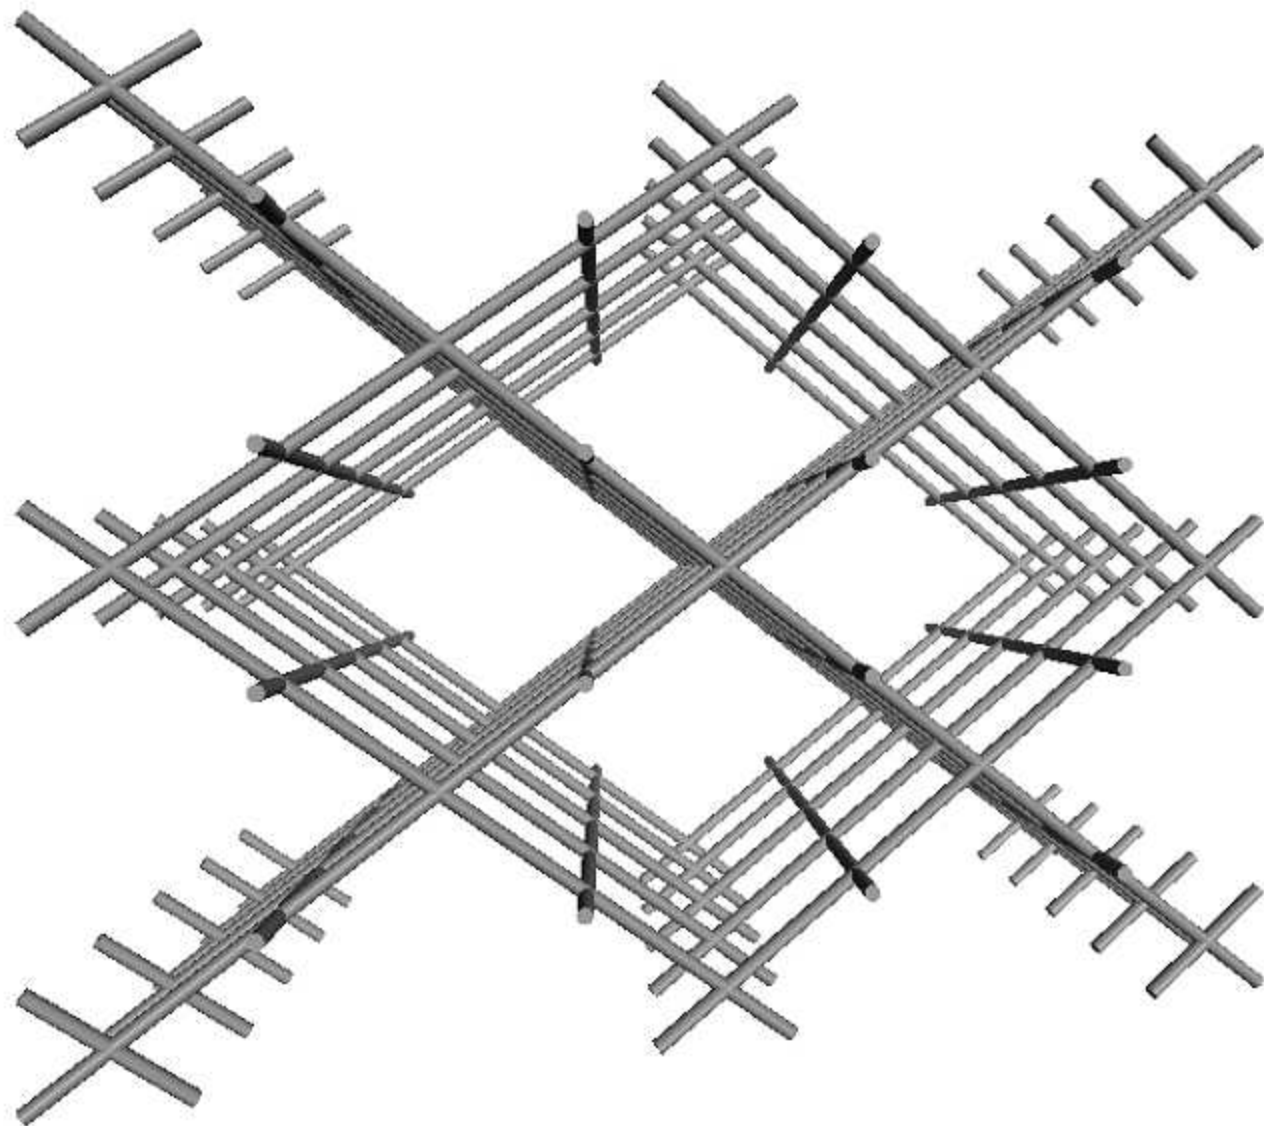

Supplement: b301221b2.pdf [file b301221b2.pdf]

# 4-connected nets: $\text{CdSO}_4$

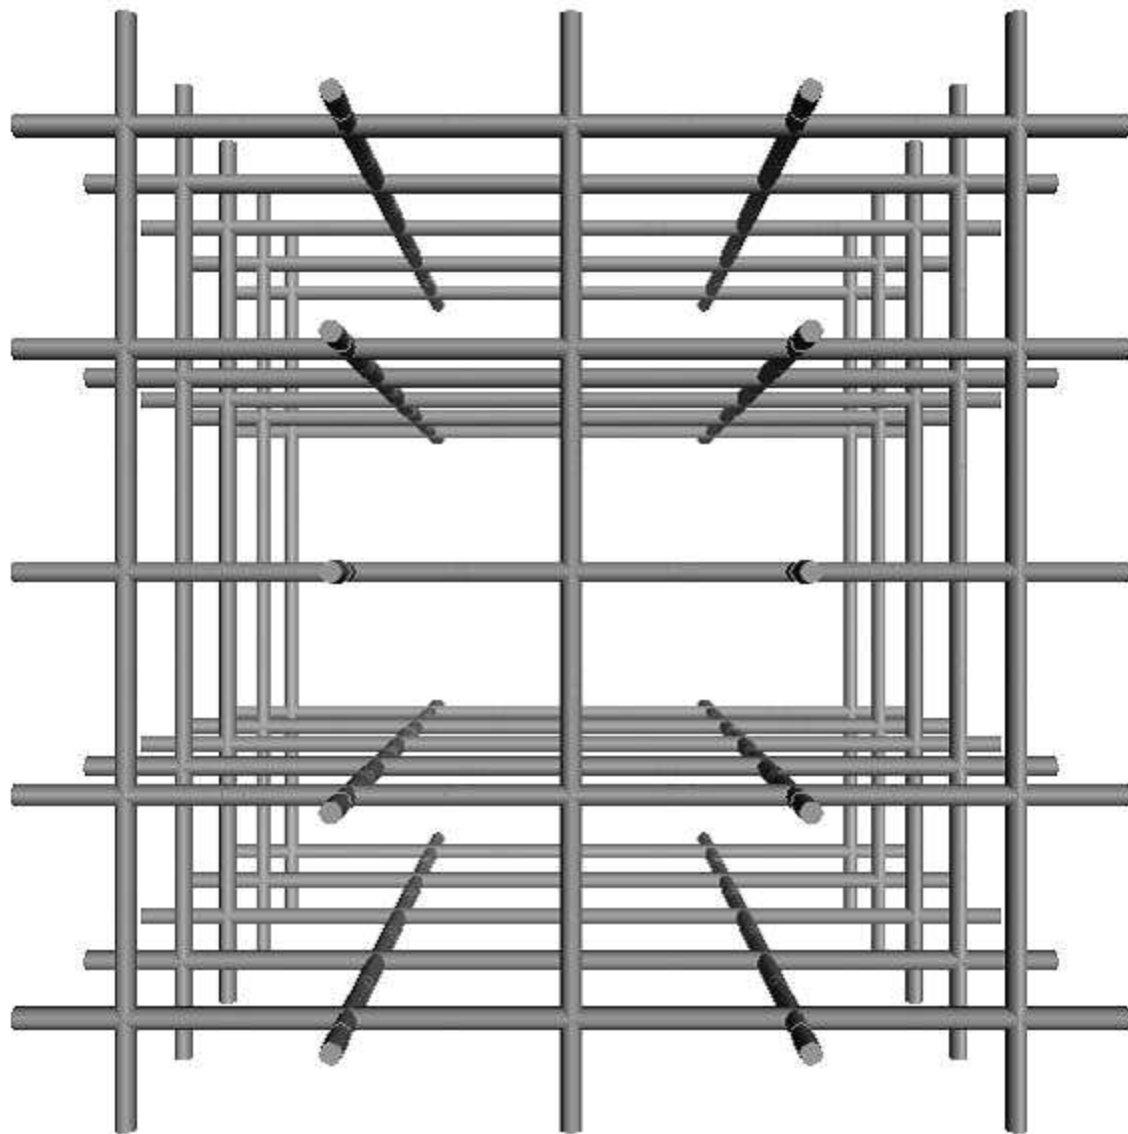

Supplement: b301221b3.pdf [file b301221b3.pdf]

6-connected net: USF-2

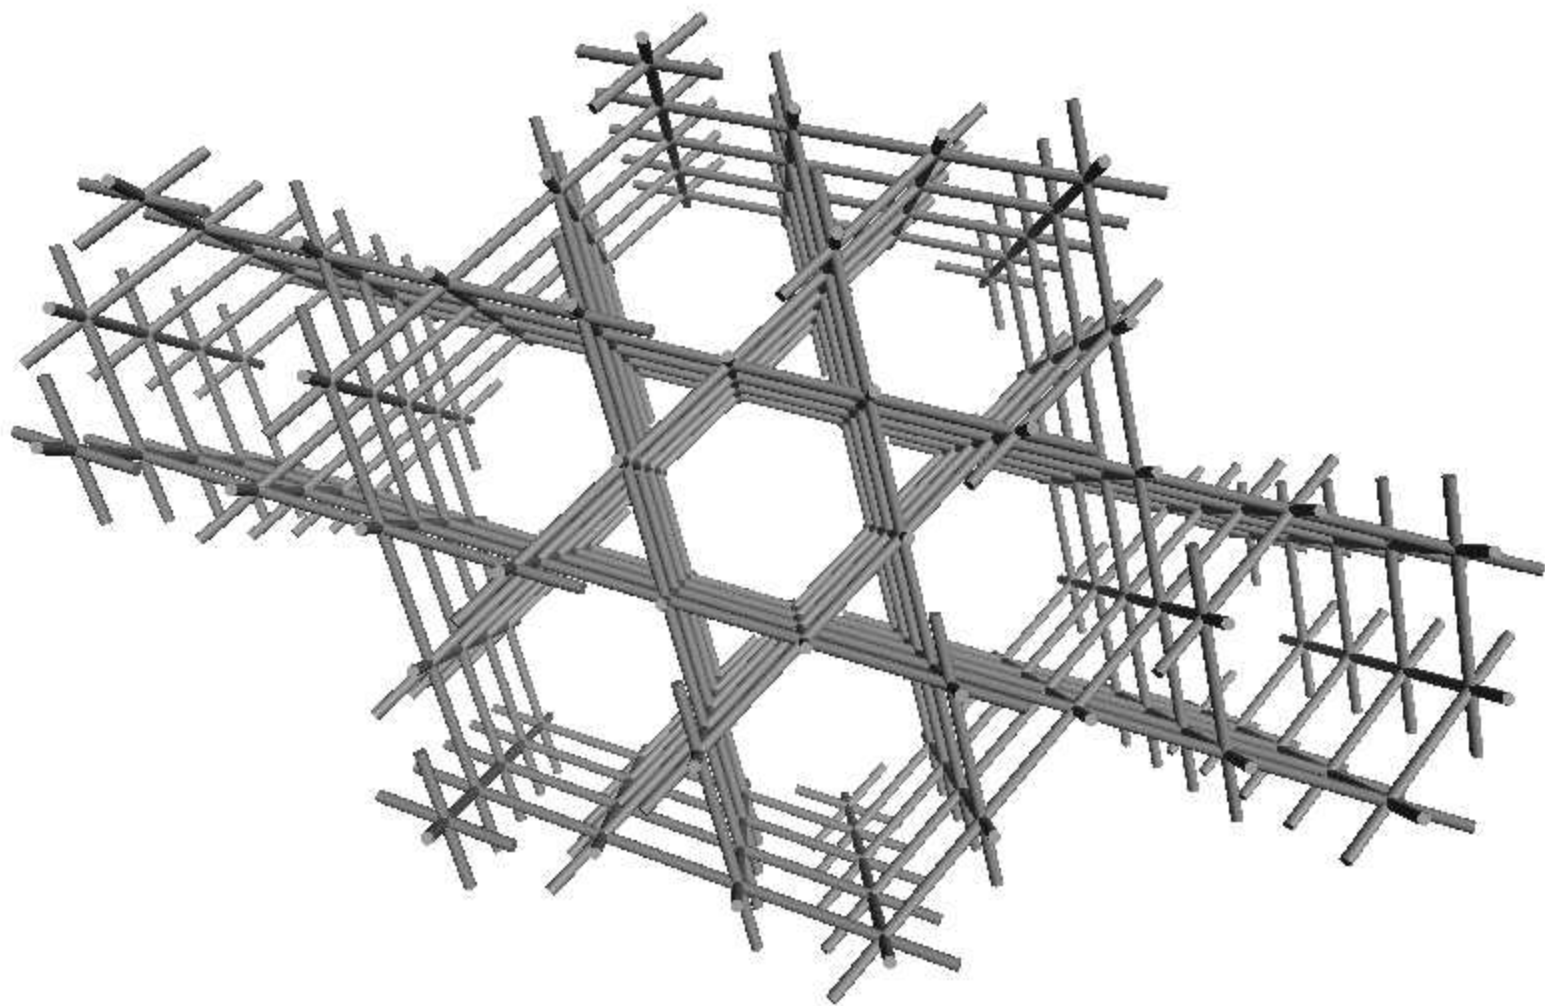

Supplement: b301221b6.pdf [file b301221b6.pdf]
